# Supplementary material for: Transcriptomic Properties of HER2+ Ductal Carcinoma In Situ of the Breast Associate with Absence of Immune Cells
Source: MDPI journal article supplement (doi:10.3390/biology10080768), 2021-08-12
Supplement: s1 [file s1]

## Supplementary tables

**Supplementary Table 1:** Antibody characteristics and used protocol for whole tissue IHC

| Antibody       | Type        | Concentration /dilution | Company | Clone          | Lot number    | Procedure         | Incubation time |
|----------------|-------------|-------------------------|---------|----------------|---------------|-------------------|-----------------|
| <b>ER</b>      | Anti-Rabbit | 1 µg/ml                 | Ventana | SP1            | F02583        | Ultraview CC1 64' | 32 minutes      |
| <b>PR</b>      | Anti-Rabbit | 1 µg/ml                 | Ventana | 1E2            | Y08684        | Ultraview CC1 36' | 12 minutes      |
| <b>HER2neu</b> | Anti-Rabbit | 6 µg/ml                 | Ventana | 4B5            | E06192        | Ultraview CC1 36' | 32 minutes      |
| <b>Ki67</b>    | Anti-Rabbit | 2 µg/ml                 | Ventana | 30-9           | F01342        | Ultraview CC1 36' | 28 minutes      |
| <b>P53</b>     | Anti-Mouse  | 2.5 µg/ml               | Ventana | Bp53-11        | F27098        | Ultraview CC1 64' | 4 minutes       |
| <b>CCND3</b>   | Anti-Mouse  | 1:100                   | Abcam   | DCS2.2         | GR3223 822-11 | Optiview CC1 32'  | 120 minutes     |
| <b>DUSP10</b>  | Anti-Rabbit | 1:100                   | Abcam   | polyclo<br>nal | GR3213 653-10 | Ultraview CC1 36' | 32 minutes      |
| <b>RAP1GAP</b> | Anti-Rabbit | 1:3000                  | Abcam   | Y134           | GR2579 21-12  | Ultraview CC1 36' | 32 minutes      |

**Supplementary table 2:** Patient and DCIS characteristics according to TIL density

|                                 | <b>TIL-poor (n=12)</b> | <b>TIL-rich (n=11)</b> | <b>p-value</b> |
|---------------------------------|------------------------|------------------------|----------------|
| Age (in years; mean - range)    | 57.3 (38.0-72.0)       | 54.5 (37.0-73.0)       | 0.689          |
| DCIS size (in cm; mean - range) | 3.2 (0.9-6.50)         | 4.38 (1.5-9.0)         | 0.341          |
| Grade (%)                       |                        |                        |                |
| Low                             | 0 (n.a.)               | 0 (n.a.)               | 1              |
| Intermediate                    | 1 (100)                | 0 (0)                  |                |
| High                            | 11 (50)                | 11 (50)                |                |
| Comedonecrosis (%)              |                        |                        |                |
| Absent                          | 2 (67)                 | 1 (33)                 | 1              |
| Present                         | 10 (50)                | 10 (50)                |                |
| Growth Pattern (%)              |                        |                        |                |
| Solid                           | 9 (60)                 | 6 (40)                 | 0.427          |
| Cribriform                      | 3 (43)                 | 4 (57)                 |                |
| Papillary                       | 0 (0)                  | 1 (100)                |                |
| p53 expression (%)              |                        |                        |                |
| Wild type                       | 4 (57)                 | 3 (43)                 | 0.822          |
| Abarrent                        | 6 (55)                 | 5 (45)                 |                |
| NULL                            | 2 (40)                 | 3 (60)                 |                |
| Ki67 (mean - range)             | 14.8 (3.0-25.0)        | 13.5 (5.0-25.0)        | 0.507          |

n.a. = not appplicable
